[illegible]
